# Supplementary material for: Fullerene derivative anchored SnO2 for high-performance perovskite solar cells
Source: Royal Society of Chemistry journal article supplement (doi:10.1039/c8ee02172d), 2018-01-01
Supplement: c8ee02172d1.pdf [file c8ee02172d1.pdf]

Electronic supplementary information

## **Fullerene derivative anchored SnO<sub>2</sub> for high-performance perovskite solar cells**

Kuan Liu<sup>ab</sup>, Shuang Chen<sup>c</sup>, Jionghua Wu<sup>b</sup>, Huiyin Zhang<sup>b</sup>, Minchao Qin<sup>d</sup>, Xinhui Lu<sup>d</sup>, Yingfeng Tu<sup>c\*</sup>,  
Qingbo Meng<sup>b\*</sup>, and Xiaowei Zhan<sup>a\*</sup>

*<sup>a</sup> Department of Materials Science and Engineering, College of Engineering, Key Laboratory of Polymer Chemistry and Physics of Ministry of Education, Peking University, Beijing 100871, China.*

*E-mail: xwzhan@pku.edu.cn*

*<sup>b</sup> CAS Key Laboratory for Renewable Energy, Beijing Key Laboratory for New Energy Materials and Devices, Institute of Physics, Chinese Academy of Sciences, Beijing 100190, China. E-mail:*

*qbmeng@iphy.ac.cn*

*<sup>c</sup> Jiangsu Key Laboratory of Advanced Functional Polymer Design and Application, College of Chemistry, Chemical Engineering and Materials Science, Soochow University, Suzhou 215123, China. E-mail: tuyingfeng@suda.edu.cn*

*<sup>d</sup> Department of Physics, The Chinese University of Hong Kong, New Territories 999077, Hong Kong, China.*

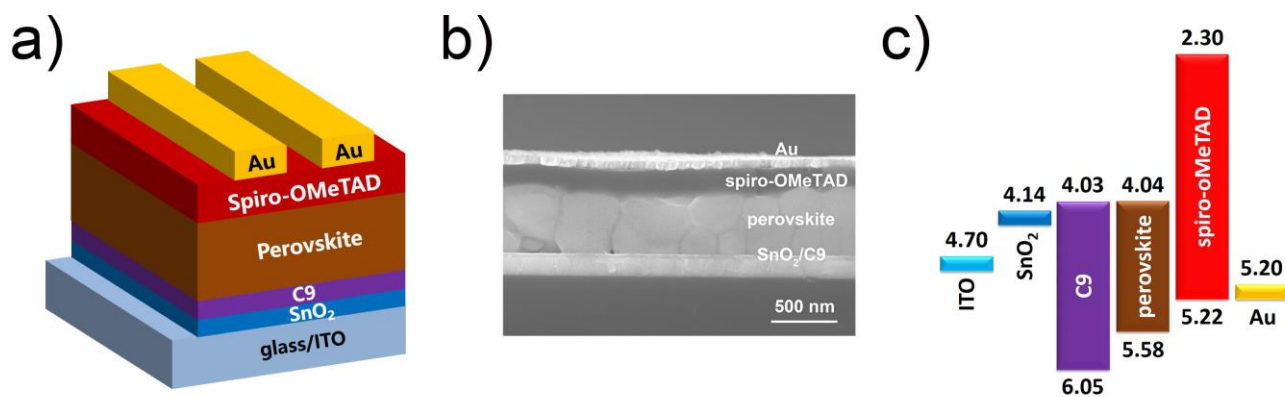

**Fig. S1** (a) Schematic device architecture of PHJ PSCs based on C9 modified SnO<sub>2</sub> ETL. (b) Cross-sectional SEM image of a typical C9 modified device. (c) Energy levels diagram of corresponding layers in the device.

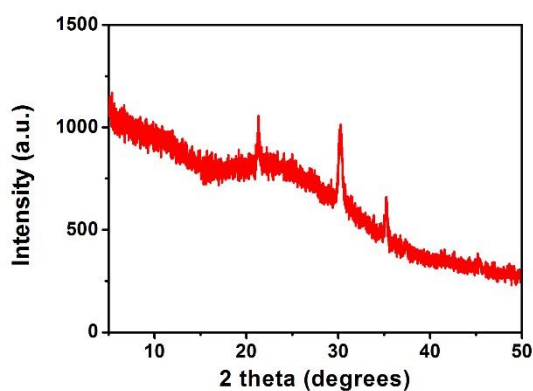

**Fig. S2** XRD pattern of the low-temperature processed SnO<sub>2</sub> compact layer.

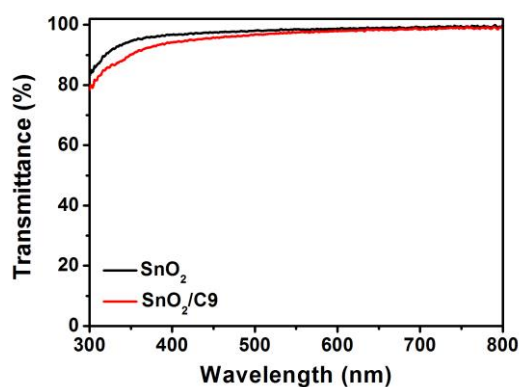

**Fig. S3** Transmission spectra of C9 modified and bare SnO<sub>2</sub> deposited on glass substrates.

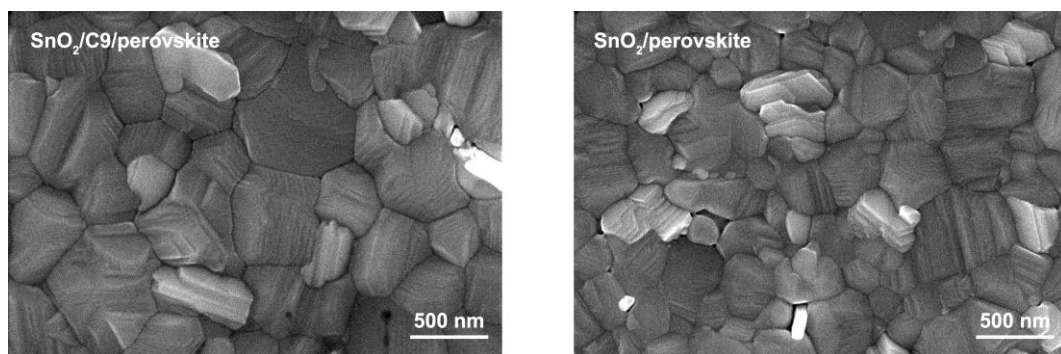

**Fig. S4** Top-view SEM images of the perovskite films on C9 modified and bare SnO<sub>2</sub> substrates.

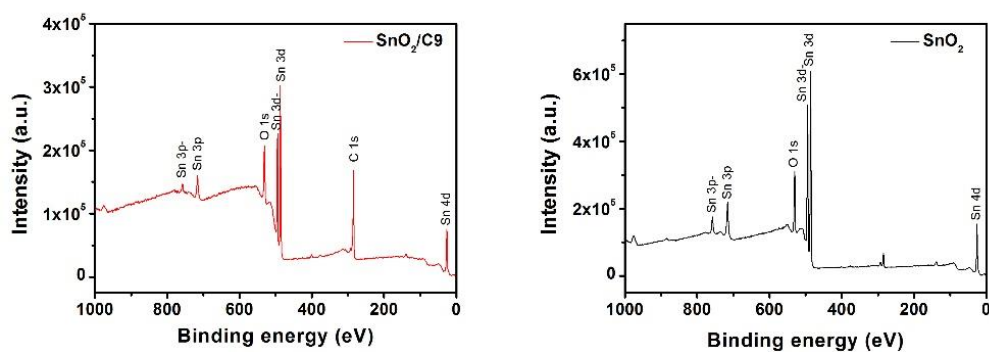

**Fig. S5** XPS survey scans for C9 modified SnO<sub>2</sub> and bare SnO<sub>2</sub>.

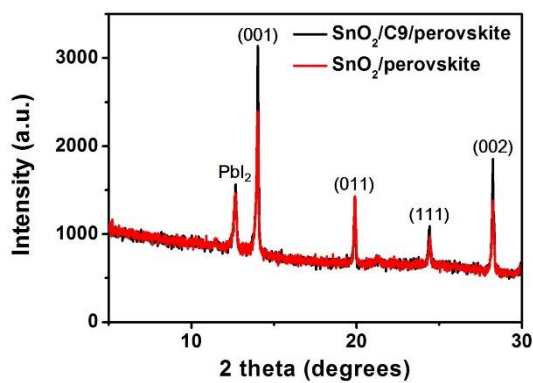

**Fig. S6** XRD patterns of the (FAPbI<sub>3</sub>)<sub>x</sub>(MAPbBr<sub>3</sub>)<sub>1-x</sub> based perovskite on C9 modified and bare SnO<sub>2</sub> substrates.

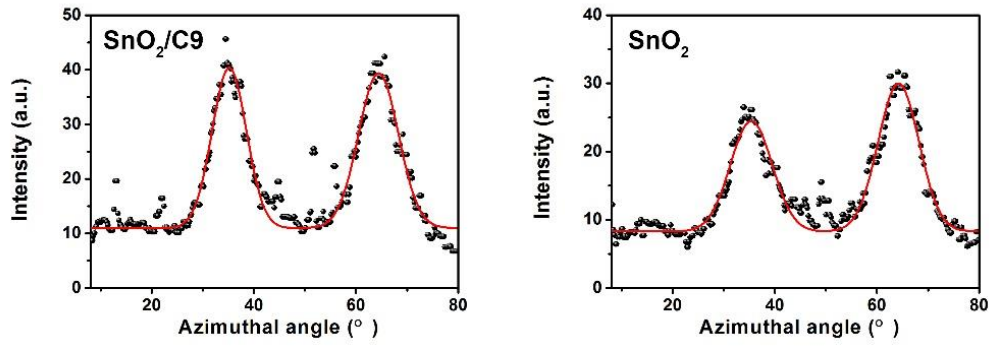

**Fig. S7** The polar intensity profiles along the ring in the  $q_r$  range of 0.98 to 1.02  $\text{\AA}^{-1}$  for the perovskite films deposited on C9 modified and bare  $\text{SnO}_2$ , respectively.

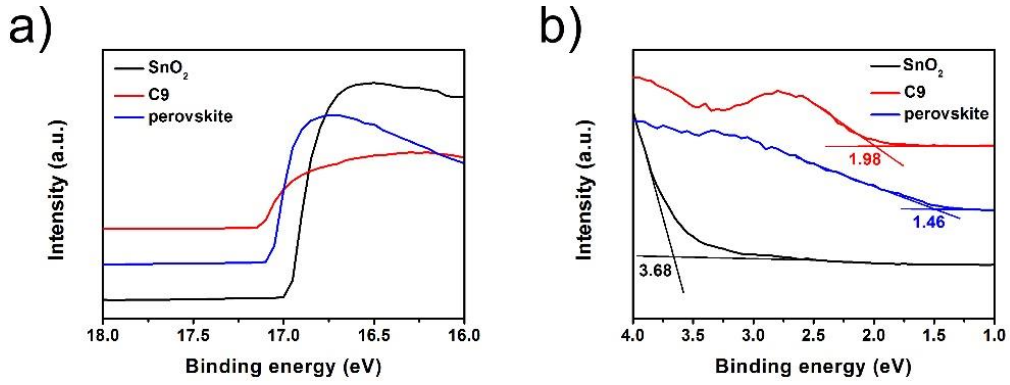

**Fig. S8** UPS results of  $\text{SnO}_2$ , C9 and  $(\text{FAPbI}_3)_x(\text{MAPbBr}_3)_{1-x}$  based perovskite in the (a) secondary-electron cut-off and (b) valence-band regions.

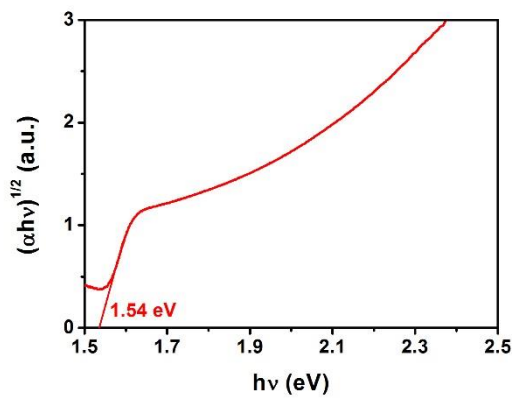

**Fig. S9** The relationship of  $(\alpha h\nu)^{1/2}$  vs energy for the perovskite film. The bandgap can be determined *via* linear extrapolation of the leading edges of the  $(\alpha h\nu)^{1/2}$  curve to the base line.

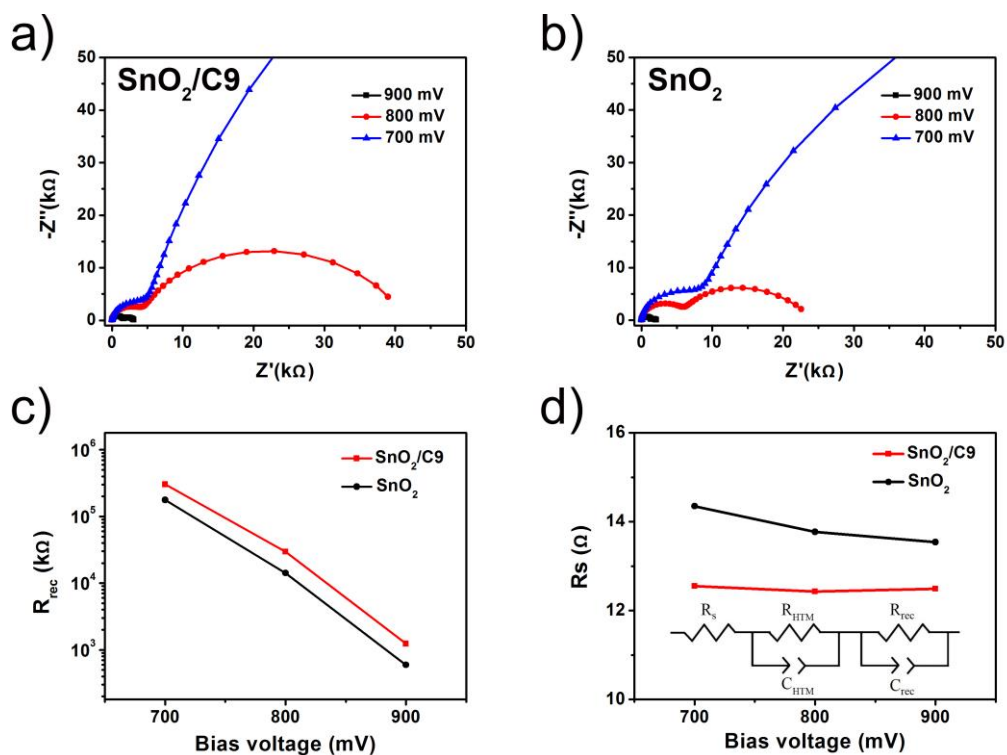

**Fig. S10** Nyquist plots of representative devices based on (a) C9 modified  $\text{SnO}_2$  and (b) bare  $\text{SnO}_2$  ETL in the dark under 700, 800, 900 mV bias voltage. The relationship between bias voltages and (c)  $R_{\text{rec}}$  and (d)  $R_s$  for both devices. Inset: equivalent circuit for the simulation of charge transfer and recombination process.

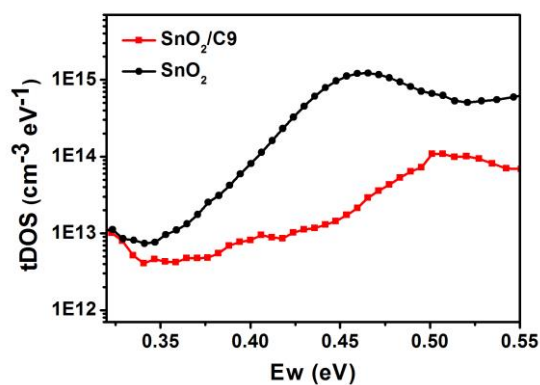

**Fig. S11** TAS results for the perovskite films deposited on C9 modified and bare  $\text{SnO}_2$ .

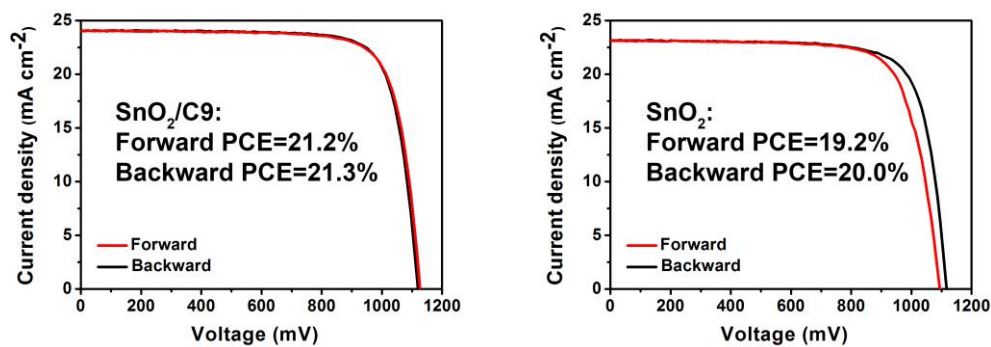

**Fig. S12** Hysteresis effect in  $J$ - $V$  curves for the best-performing PHJ PSCs based on C9 modified and bare  $\text{SnO}_2$  ETL under different scanning directions.

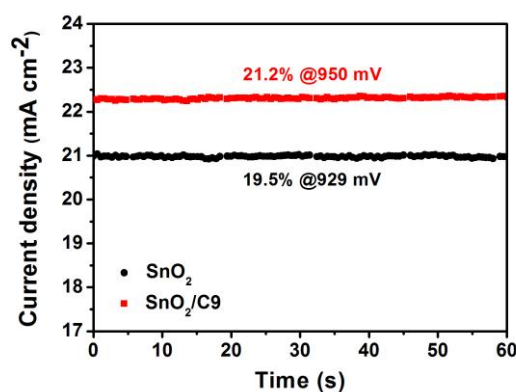

**Fig. S13** The steady-state photocurrent output and stabilized PCE of the modified device based on  $\text{SnO}_2/\text{C9}$  and the control device based on bare  $\text{SnO}_2$  under their maximum power point.

**Table S1.** The band structure parameters of SnO<sub>2</sub>, C9 and (FAPbI<sub>3</sub>)<sub>x</sub>(MAPbBr<sub>3</sub>)<sub>1-x</sub> based perovskite.

| Materials        | Work<br>function (eV) | Valance band<br>maximum (eV) | $E_g$ (eV) | HOMO (eV) | LUMO (eV) |
|------------------|-----------------------|------------------------------|------------|-----------|-----------|
| SnO <sub>2</sub> | 4.17                  | 3.68                         | 3.71       | 7.85      | 4.14      |
| C9               | 4.07                  | 1.98                         | 2.02       | 6.05      | 4.03      |
| Perovskite       | 4.12                  | 1.46                         | 1.54       | 5.58      | 4.04      |

**Table S2.** Fitting parameters of bi-exponential decay function in time-resolved PL spectra.

| Films                                      | $A_1$ | $\tau_1$ (ns) | $A_2$ | $\tau_2$ (ns) | Average decay<br>time $\tau$ (ns) <sup>a</sup> |
|--------------------------------------------|-------|---------------|-------|---------------|------------------------------------------------|
| Al <sub>2</sub> O <sub>3</sub> /perovskite | 0.54  | 644.68        | 0.41  | 2032.48       | 1238.90                                        |
| SnO <sub>2</sub> /perovskite               | 0.30  | 82.82         | 0.67  | 248.47        | 197.26                                         |
| SnO <sub>2</sub> /C9/perovskite            | 0.30  | 62.68         | 0.67  | 160.61        | 130.17                                         |

<sup>a</sup> Average decay time is calculated according to the equation:  $\tau = (A_1\tau_1 + A_2\tau_2)/(A_1 + A_2)$ .

**Table S3.** Fitting parameters of bi-exponential decay function in TPV measurement.

| Devices              | $A_1$ | $\tau_1$ (ms) | $A_2$ | $\tau_2$ (ms) | Average decay<br>time $\tau_v$ (ms) <sup>a</sup> |
|----------------------|-------|---------------|-------|---------------|--------------------------------------------------|
| SnO <sub>2</sub> /C9 | 0.79  | 0.09          | 0.18  | 8.47          | 1.65                                             |
| SnO <sub>2</sub>     | 0.81  | 0.07          | 0.17  | 2.42          | 0.48                                             |

<sup>a</sup> Average decay time is calculated according to the equation:  $\tau_v = (A_1\tau_1 + A_2\tau_2)/(A_1 + A_2)$ .

**Table S4.** Fitting parameters of bi-exponential decay function in TPC measurement.

| Devices              | A <sub>1</sub> | $\tau_1$ ( $\mu$ s) | A <sub>2</sub> | $\tau_2$ ( $\mu$ s) | Average decay time $\tau_c$ ( $\mu$ s) <sup>a</sup> |
|----------------------|----------------|---------------------|----------------|---------------------|-----------------------------------------------------|
| SnO <sub>2</sub> /C9 | 0.60           | 1.03                | 0.60           | 1.03                | 1.03                                                |
| SnO <sub>2</sub>     | 0.41           | 1.21                | 0.41           | 1.21                | 1.21                                                |

<sup>a</sup> Average decay time is calculated according to the equation:  $\tau_c = (A_1\tau_1 + A_2\tau_2) / (A_1 + A_2)$ .

**Table S5.** Photovoltaic parameters of PHJ PSCs with different thickness of C9 modifying layer.

| Devices                               | Concentration<br>(mg mL <sup>-1</sup> ) | J <sub>SC</sub> (mA<br>cm <sup>-2</sup> ) | Calculated<br>J <sub>SC</sub> (mA cm <sup>-2</sup> ) | V <sub>OC</sub> (V) | FF (%) | H-index <sup>a</sup><br>(%) | PCE<br>(%) |
|---------------------------------------|-----------------------------------------|-------------------------------------------|------------------------------------------------------|---------------------|--------|-----------------------------|------------|
| SnO <sub>2</sub> /C9                  | 5                                       | 23.1                                      | 21.9                                                 | 1.10                | 76.1   | 0.9                         | 19.3       |
|                                       | 2                                       | 23.2                                      | 22.0                                                 | 1.11                | 77.6   | 0.9                         | 20.0       |
|                                       | 1                                       | 23.5                                      | 22.2                                                 | 1.11                | 78.1   | 0.8                         | 20.4       |
|                                       | 0.5                                     | 24.1                                      | 22.8                                                 | 1.12                | 78.9   | 0.5                         | 21.3       |
|                                       | 0.2                                     | 23.8                                      | 22.5                                                 | 1.12                | 77.9   | 1.7                         | 20.6       |
| SnO <sub>2</sub> /PC <sub>61</sub> BM | 0.5                                     | 23.0                                      | 22.0                                                 | 1.10                | 77.0   | 2.8                         | 19.9       |

<sup>a</sup> H-index = (PCE<sub>backward</sub> - PCE<sub>forward</sub>) / PCE<sub>backward</sub>.
